# Supplementary material for: Conformation change significantly affected the optical and electronic properties of arylsulfonamide-substituted anthraquinones
Source: Royal Society of Chemistry journal article supplement (doi:10.1039/d0cc04611f), 2020-01-01
Supplement: d0cc04611f1.pdf [file d0cc04611f1.pdf]

**Electronic supplementary information for**  
**Conformation Change Significantly Affected the Optical and**  
**Electronic Properties of Arylsulfonamide-Substituted**  
**Anthraquinones**

Takashi Takeda\* and Tomoyuki Akutagawa

*Institute of Multidisciplinary Research for Advanced Materials, Tohoku University, Sendai, 980-8577, Japan*

**CONTENTS**

|                                                                                                                 | <b>Page</b> |
|-----------------------------------------------------------------------------------------------------------------|-------------|
| <b>1. Comparison of UV-Vis spectra of <i>N</i>-Me derivatives 1-4 and <i>N</i>-H derivatives 5-8.....</b>       | <b>S2</b>   |
| <b>2. Comparison of reduction potentials of <i>N</i>-Me derivatives 1-4 and <i>N</i>-H derivatives 5-8.....</b> | <b>S2</b>   |
| <b>3. ORTEP drawings of 1.....</b>                                                                              | <b>S3</b>   |
| <b>4. HOMO LUMO and oscillator strength of the HOMO-LUMO transition of 1-8.....</b>                             | <b>S3</b>   |
| <b>5. Solid state UV-Vis spectra of 1-4.....</b>                                                                | <b>S4</b>   |
| <b>6. Experimental section.....</b>                                                                             | <b>S5</b>   |
| <b>7. <sup>1</sup>H NMR spectra of 1-4.....</b>                                                                 | <b>S7</b>   |
| <b>8. Cartesian coordinates for optimized structures 1-4.....</b>                                               | <b>S10</b>  |
| <b>9. Reference.....</b>                                                                                        | <b>S14</b>  |

1. Comparison of UV-Vis spectra of *N*-Me derivatives 1-4 and *N*-H derivatives 5-8

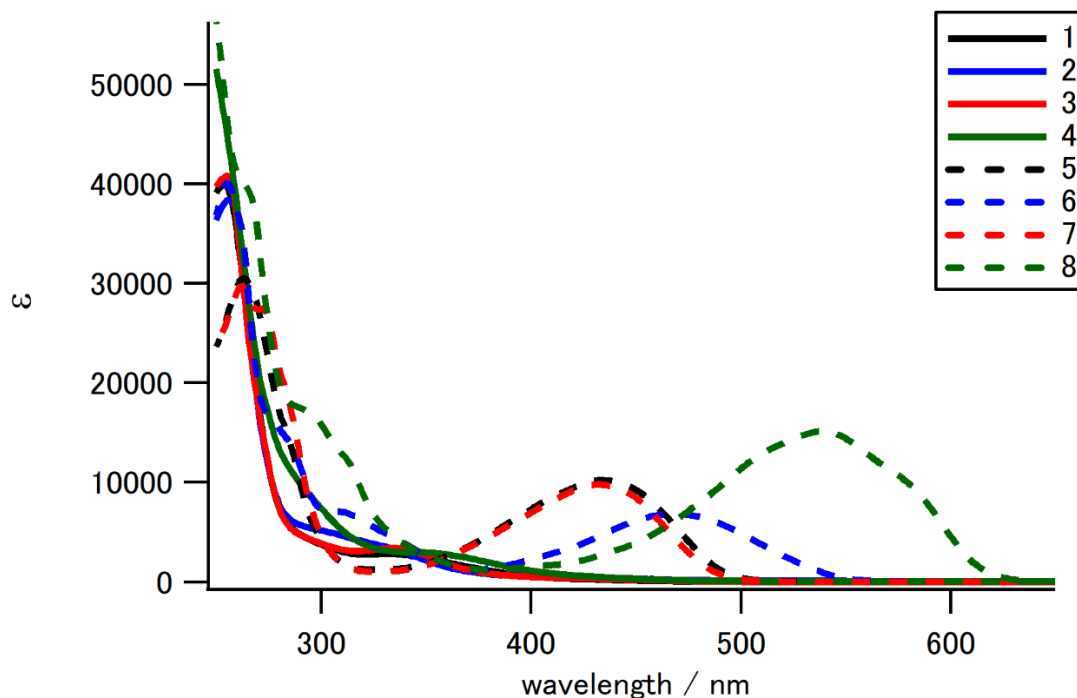

Figure S1 UV-Vis spectra of 1-4 (bold line) and 5-8 (dotted line) in CH<sub>2</sub>Cl<sub>2</sub>.

2. Comparison of reduction potentials of *N*-Me derivatives 1-4 and *N*-H derivatives 5-8

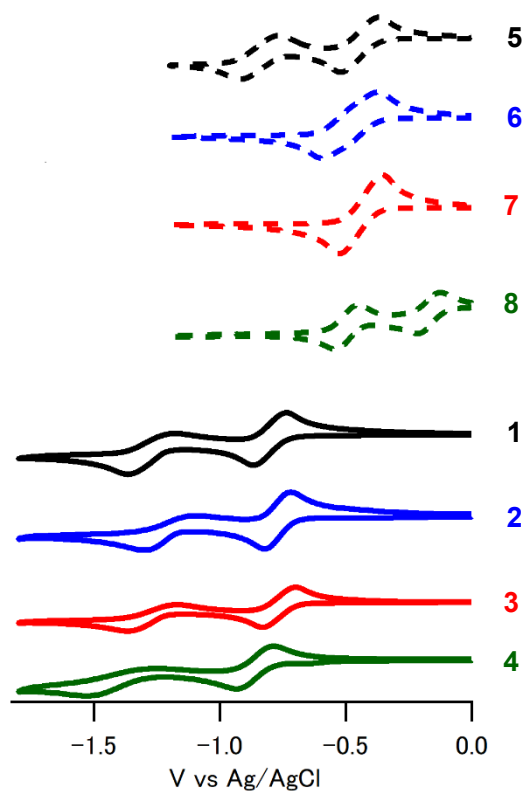

Figure S2 Cyclic voltammograms of 1-8 in CH<sub>2</sub>Cl<sub>2</sub> (0.1 M Bu<sub>4</sub>NBF<sub>4</sub>, 100 mV/sec).

### 3. ORTEP drawing of 1

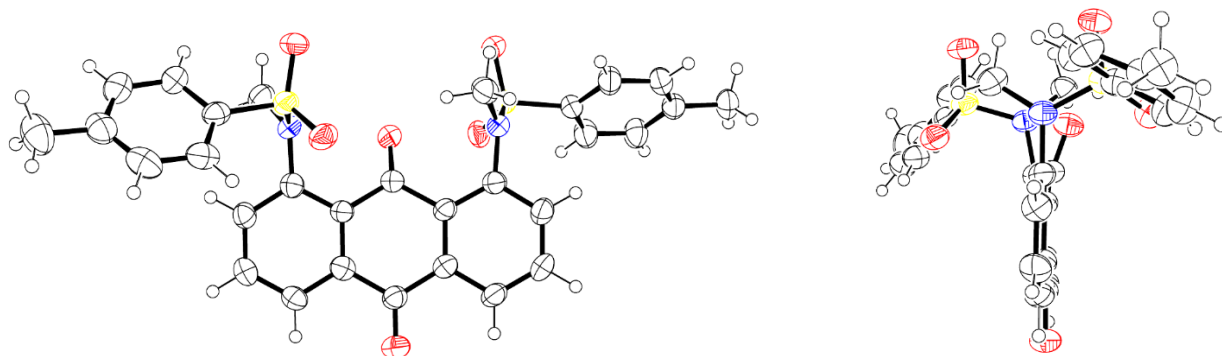

**Figure S3** ORTEP drawing of **1**. Front view (left) and side view (right). Displacement ellipsoids are drawn at the 50% probability level.

### 4. HOMO, LUMO and oscillator strength of the HOMO-LUMO transition of 1-8

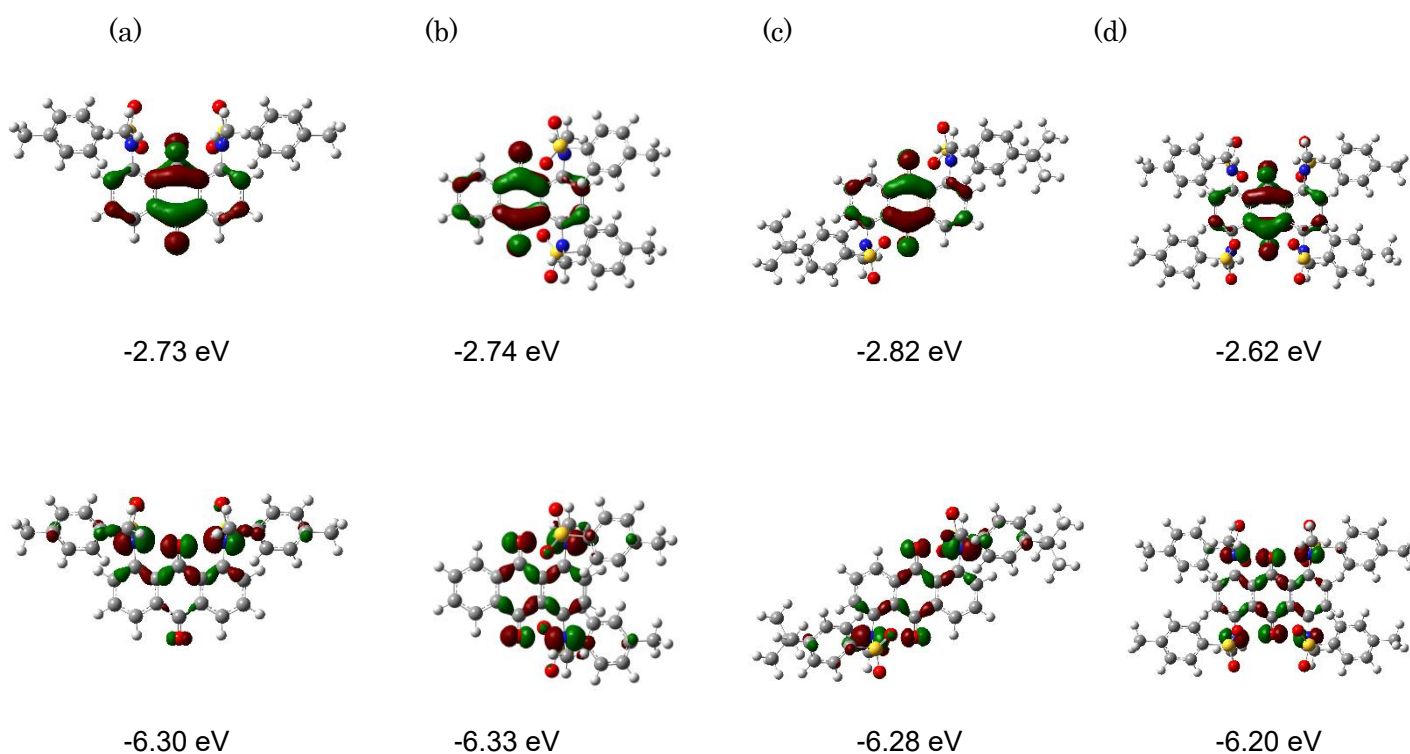

**Figure S4** LUMO (top), HOMO (bottom) and their energies for (a) **1**, (b) **2**, (c) **3**, and (d) **4**.

Atomic orbital coefficients of 2py orbital of nitrogen atoms (y axis defined as perpendicular to the anthraquinone plane). HOMO: **1**: 0.04484, -0.04488, **2**: 0.29211, -0.29190, **3**: 0.15059, -0.14513, **4**: 0.02196, 0.02196, -0.02195, -0.02196; LUMO: **1**: 0.00282, 0.00283, **2**: -0.00495, -0.00497, **3**: 0.00231, -0.00280, **4**: 0.00167, -0.00167, -0.00167, 0.00167.

Oscillator strength of the HOMO-LUMO transition: **1**: 0.0078, **2**: 0.0004, **3**: 0.0000, **4**: 0.0000.

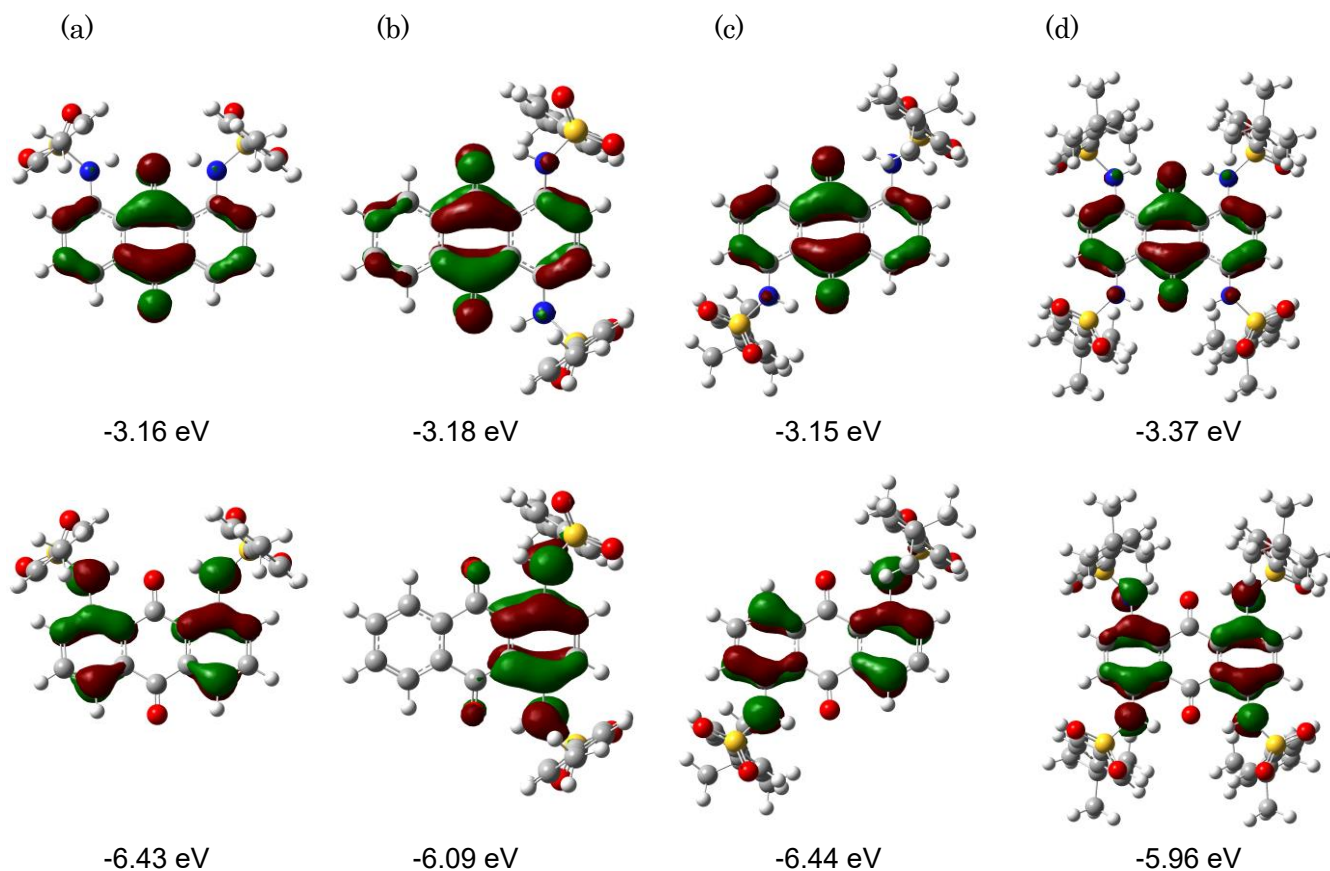

**Figure S5** LUMO (top), HOMO (bottom) and their energies for (a) **5**, (b) **6**, (c) **7**, and (d) **8**.

Atomic orbital coefficients of 2py orbital of nitrogen atoms (y axis defined as perpendicular to the anthraquinone plane). HOMO: **5**: -0.16150, 0.16474, **6**: -0.07353, -0.07330, **7**: 0.22514, 0.22522, **8**: 0.05006, 0.04984, 0.04999, 0.04980; LUMO: **5**: -0.04127, -0.04204, **6**: 0.02465, 0.02455, **7**: 0.06217, -0.06217, **8**: -0.02273, -0.02264, 0.02270, 0.02263.

Oscillator strength of the HOMO-LUMO transition: **5**: 0.1891, **6**: 0.1428, **7**: 0.2421, **8**: 0.3188.

## 5. Solid state UV-Vis spectra of 1-4

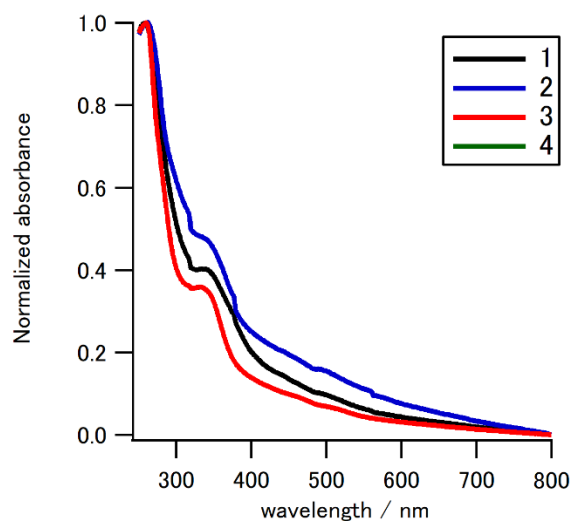

**Figure S6** Normalized UV-Vis spectra of **1-4** in the solid state. The absorption of **4** overlapped with that of **3**.

## 6. Experimental section

**General methods.** Commercially available reagents and solvents were used as received. Compounds **5-8** were prepared by as described in the literature.<sup>S1</sup> <sup>1</sup>H (400 MHz) and <sup>13</sup>C (100 MHz) NMR spectra were recorded on a Bruker Avance III 400 NMR spectrometer. Chemical shifts ( $\delta$ ) are expressed in ppm with reference to tetramethylsilane (<sup>1</sup>H 0.00 ppm) or residual nondeuterated solvent (CDCl<sub>3</sub>; <sup>13</sup>C 77.0 ppm) as an internal standard. Mass spectra were recorded on a JMS-700 spectrometer at the NMR and MS Laboratory, Graduate School of Agriculture, Tohoku University. Elemental analyses were performed on a Microcoder JM10 at the Elementary Analysis Laboratory, Institute of Multidisciplinary Research for Advanced Materials, Tohoku University. IR spectra were measured on a Thermo Scientific NICOLET 6700 FT-IR spectrometer.

### Preparation of **1**.<sup>S1</sup>

To a suspension of NaH (60% in oil, 333 mg, 8.33 mmol) in dry DMF (20 mL) was added **5** (303 mg, 554  $\mu$ mol) under N<sub>2</sub>. The mixture was stirred at rt for 45 min. To the resulting solution was added MeI (700  $\mu$ L, 11.0 mmol) at this temperature. The mixture was stirred at rt for 12 h. The mixture was diluted with an excess amount of water. The resulting precipitate was collected by filtration, washed with water, and then dried under vacuum. Recrystallization from EtOH gave **1** (171 mg, 54%) as an orange crystalline solid.

Mp: 236-237 °C. <sup>1</sup>H NMR (400 MHz):  $\delta$  8.24 (dd,  $J = 7.8, 1.3$  Hz, 2H), 7.70 (d,  $J = 7.8$  Hz, 4H), 7.63 (t,  $J = 7.6$  Hz, 2H), 7.47 (dd,  $J = 7.8, 1.3$  Hz, 2H), 7.31 (d,  $J = 7.8$  Hz, 4H), 3.24 (s, 6H), 2.43 (s, 6H). <sup>13</sup>C NMR (100 MHz):  $\delta$  182.6, 182.3, 143.5, 140.3, 136.0, 134.6, 133.6, 133.0, 129.6, 127.9, 126.9, 38.8, 21.6. IR: 3072, 2948, 2919, 1680, 1585, 1495, 1461, 1436, 1400, 1345, 1318, 1249, 1216, 1188, 1150, 1089, 1020, 1011, 957, 871, 850, 802, 752, 730, 688, 675, 651, 581, 563, 545, 517 cm<sup>-1</sup>. HRMS (FAB) calcd for C<sub>30</sub>H<sub>27</sub>N<sub>2</sub>O<sub>6</sub>S<sub>2</sub>: 575.1311 [(M+H)<sup>+</sup>]; found: 575.1309. Anal. Calcd for C<sub>30</sub>H<sub>26</sub>N<sub>2</sub>O<sub>6</sub>S<sub>2</sub>: C, 62.70 H, 4.56; N, 4.87. Found: C, 62.55 H, 4.73; N, 4.78.

### Preparation of **2**.

A mixture of **6** (200 mg, 366  $\mu$ mol), K<sub>2</sub>CO<sub>3</sub> (506 mg, 3.66 mmol) and MeI (455  $\mu$ L, 7.32 mmol) in DMF (10 mL) was stirred at 50 °C for 13.5 h in a sealed glass pressure vessel. After cooling to rt, the mixture was diluted with H<sub>2</sub>O. The resulting precipitate was collected by filtration, washed with H<sub>2</sub>O, and then dried under vacuum. Recrystallization from CHCl<sub>3</sub>/EtOH gave **2** (195 mg, 93%) as a yellow solid.

Mp: 228-229 °C (decomp.). <sup>1</sup>H NMR (400 MHz, 50 °C):  $\delta$  7.92 (br s, 2H), 7.68 (dd,  $J = 5.7, 3.2$  Hz, 2H), 7.57 (t,  $J = 8.2$  Hz, 4H), 7.42 (s, 2H), 7.23 (d,  $J = 8.2$  Hz, 4H), 3.35 (s, 6H), 2.39 (s, 6H). IR: 1670, 1590, 1463, 1348, 1322, 1305, 1254, 1201, 1156, 1087, 931, 910, 877, 809, 795, 727, 713, 679, 636, 596, 549, 516 cm<sup>-1</sup>. HRMS (FAB) calcd for C<sub>30</sub>H<sub>27</sub>N<sub>2</sub>O<sub>6</sub>S<sub>2</sub>: 575.1311 [(M+H)<sup>+</sup>]; found: 575.1310. Anal. Calcd for C<sub>30</sub>H<sub>26</sub>N<sub>2</sub>O<sub>6</sub>S<sub>2</sub>: C, 62.70 H, 4.56; N, 4.87. Found: C, 62.88 H, 4.57; N, 4.82.

### Preparation of 3.

To a suspension of NaH (60% in oil, 380 mg, 9.51 mmol) in dry DMF (30 mL) was added **7** (400 mg, 634  $\mu\text{mol}$ ) under  $\text{N}_2$ . The mixture was stirred at rt for 45 min. To the resulting solution was added MeI (790  $\mu\text{L}$ , 12.7 mmol) at this temperature. The mixture was stirred at rt for 16.5 h. The mixture was diluted with an excess amount of water. The resulting precipitate was collected by filtration, washed with water, and then dried under vacuum. Recrystallization from  $\text{CHCl}_3/\text{EtOH}$  gave **3** (177 mg, 42%) as a yellow solid.

Mp: 268-270  $^\circ\text{C}$  (decomp.).  $^1\text{H NMR}$  (400 MHz, 50  $^\circ\text{C}$ ):  $\delta$  8.08 (br d,  $J = 7.8$  Hz, 2H), 7.65(t,  $J = 7.8$  Hz, 2H), 7.63 (d,  $J = 8.5$  Hz, 4H), 7.50 (d,  $J = 7.8$  Hz, 2H), 7.44 (d,  $J = 8.5$  Hz, 4H), 3.35 (s, 6H), 1.33 (s, 18H). IR: 3076, 2957, 1675, 1596, 1580, 1457, 1438, 1400, 1349, 1310, 1267, 1190, 1158, 1112, 1085, 1018, 877, 825, 807, 773, 756, 710, 626, 581, 552  $\text{cm}^{-1}$ . HRMS (FAB) calcd for  $\text{C}_{36}\text{H}_{39}\text{N}_2\text{O}_6\text{S}_2$ : 659.2250 [(M+H) $^+$ ]; found: 659.2250. Anal. Calcd for  $\text{C}_{36}\text{H}_{38}\text{N}_2\text{O}_6\text{S}_2$ : C, 65.60 H, 5.81; N, 4.25. Found: C, 62.60 H, 5.86; N, 4.22.

### Preparation of 4.

To a suspension of NaH (60% in oil, 304 mg, 7.60 mmol) in dry DMF (30 mL) was added **8** (400 mg, 380  $\mu\text{mol}$ ) under  $\text{N}_2$ . The mixture was stirred at rt for 45 min. To the resulting solution was added MeI (710  $\mu\text{L}$ , 11.4 mmol) at this temperature. The mixture was stirred at rt for 17 h. The mixture was diluted with an excess amount of water. The resulting precipitate was collected by filtration, washed with water, and then dried under vacuum. Recrystallization from  $\text{CHCl}_3/\text{EtOH}$  gave **4** (264 mg, 63%) as a yellow solid.

Mp: 253-255  $^\circ\text{C}$  (decomp.).  $^1\text{H NMR}$  (400 MHz):  $\delta$  7.76 (d,  $J = 8.6$  Hz, 8H), 7.56 (d,  $J = 8.6$  Hz, 8H), 7.25 (s, 4H), 3.20 (s, 12H), 1.37 (s, 36H). IR: 2964, 2871, 1702, 1595, 1477, 1397, 1349, 1333, 1307, 1269, 1217, 1160, 1111, 1085, 1042, 936, 888, 865, 842, 812, 793, 762, 671, 630, 601, 580, 547  $\text{cm}^{-1}$ . HRMS (FAB) calcd for  $\text{C}_{58}\text{H}_{69}\text{N}_4\text{O}_{10}\text{S}_4$ : 1109.3897 [(M+H) $^+$ ]; found: 1109.3899. Anal. Calcd for  $\text{C}_{58}\text{H}_{68}\text{N}_4\text{O}_{10}\text{S}_4$ : C, 62.79 H, 6.18; N, 5.05. Found: C, 62.57 H, 6.13; N, 5.00.

**X-ray structural analysis.** Crystallographic data for single crystals were collected using a diffractometer equipped with a rotating anode fitted with a multilayer confocal optic using Cu-K $\alpha$  ( $\lambda = 1.54187$   $\text{\AA}$ ) radiation. Structure refinements were carried out using the full-matrix least-squares method on  $F^2$ . Calculations were performed using the Crystal Structure and SHELEX software packages.<sup>S3</sup> Parameters were refined using anisotropic temperature factors, except for the hydrogen atom.

**Crystal data of 1:** A single-crystalline sample was obtained by recrystallization from  $\text{CHCl}_3/\text{hexane}$ .  $\text{C}_{30}\text{H}_{22}\text{N}_2\text{O}_6\text{S}_2$ ,  $M = 570.63$ ,  $P2_1/c$  (#14),  $a = 9.9499(4)$   $\text{\AA}$ ,  $b = 9.6309(4)$   $\text{\AA}$ ,  $c = 27.2708(11)$   $\text{\AA}$ ,  $\beta = 93.901(7)^\circ$ ,  $V = 2607.20(19)$   $\text{\AA}^3$ ,  $Z = 4$ ,  $D_c = 1.454$   $\text{g cm}^{-3}$ . Independent reflections 4693 (all),  $T = 100$  K,  $\mu = 22.745$   $\text{cm}^{-1}$ ,  $R = 6.15\%$ . CCDC 2013362.

**Crystal data of 2 · (CHCl<sub>3</sub>)<sub>2</sub>:** A single-crystalline sample was obtained by recrystallization from CHCl<sub>3</sub>/hexane. C<sub>32</sub>H<sub>28</sub>Cl<sub>6</sub>N<sub>2</sub>O<sub>6</sub>S<sub>2</sub>, *M* = 813.42, C2/c (#15), *a* = 52.9762(19) Å, *b* = 15.1879(5) Å, *c* = 13.2000(5) Å, *β* = 102.745(7) °, *V* = 10359.0(7) Å<sup>3</sup>, *Z* = 12, *D<sub>c</sub>* = 1.565 g cm<sup>-3</sup>. Independent reflections 9364 (all), *T* = 100K, *μ* = 60.76 cm<sup>-1</sup>, *R* = 5.41%. CCDC 2013365.

Crystal structures of **5-8** have already in published in the literature.<sup>S2</sup>

|                                        |              |
|----------------------------------------|--------------|
| <b>5</b> ·(MeCN)                       | CCDC 1550096 |
| <b>5</b> ·(EtCN)                       | CCDC 1550093 |
| <b>6</b>                               | CCDC 1550105 |
| <b>7</b>                               | CCDC 1550102 |
| <b>8</b> ·(Fluorobenzene) <sub>2</sub> | CCDC 1550149 |
| <b>8</b> ·(Benzonitrile) <sub>2</sub>  | CCDC 1576397 |

## 7. <sup>1</sup>H NMR spectra of 1-4

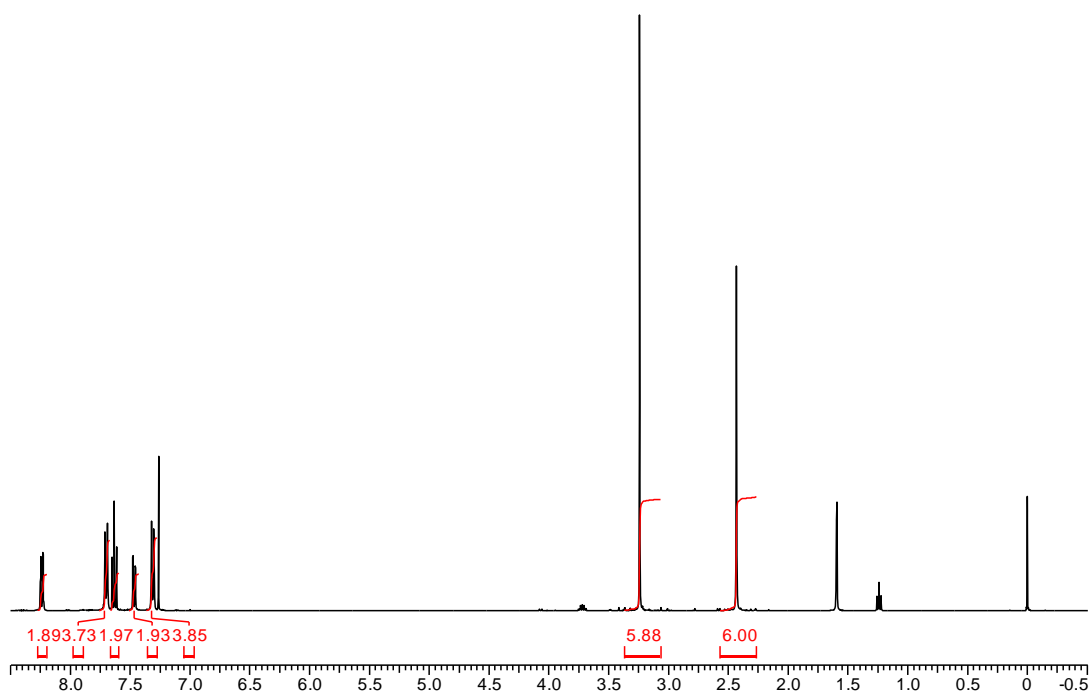

**Figure S7** <sup>1</sup>H NMR spectrum of **1**.

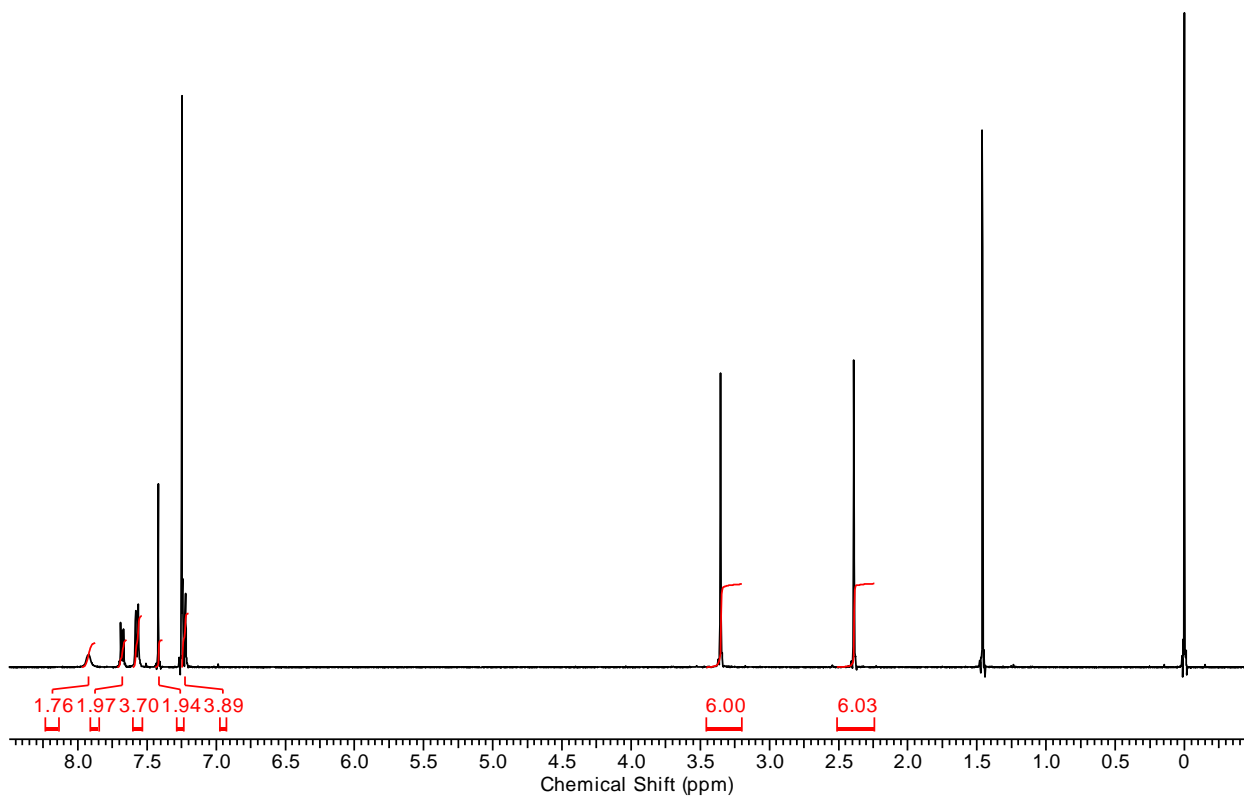

**Figure S8**  $^1\text{H}$  NMR spectrum of **2**.

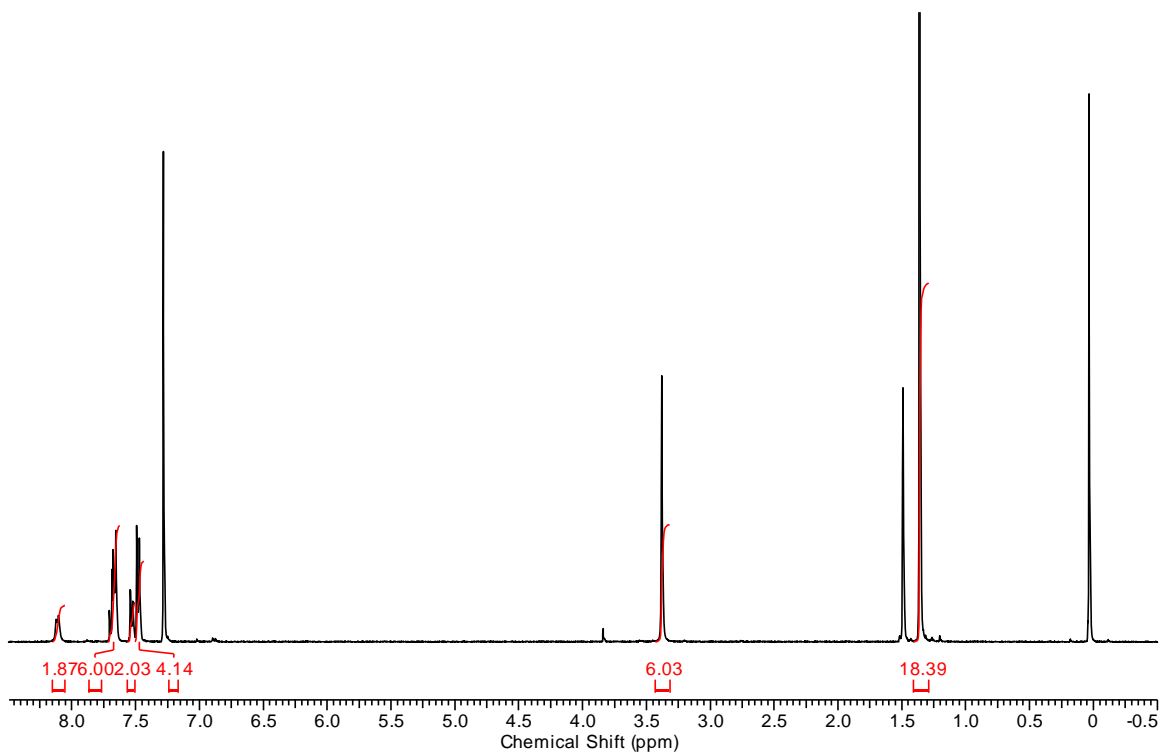

**Figure S9**  $^1\text{H}$  NMR spectrum of **3**.



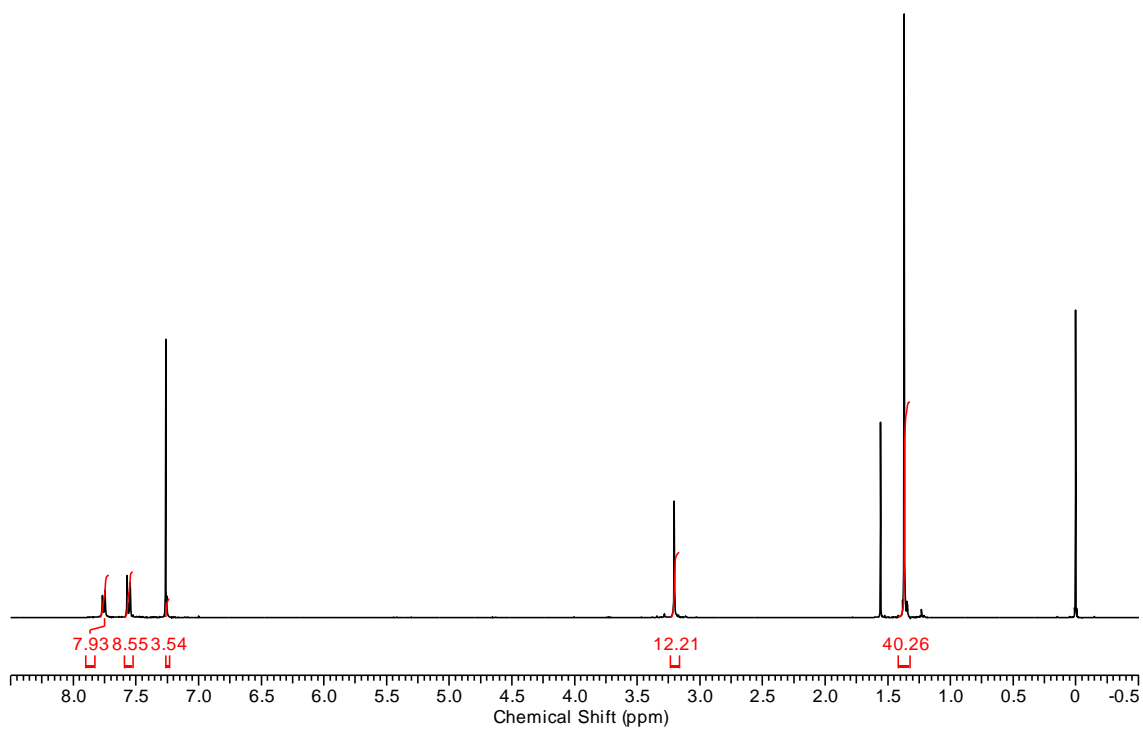

**Figure S10**  $^1\text{H}$  NMR spectrum of **4**.

## 8. Cartesian Coordinates for optimized structures 1-4

a. Optimized structure of 1

E(RB3LYP) = -2515.94134656 a.u.

Number of imaginary frequency: 0

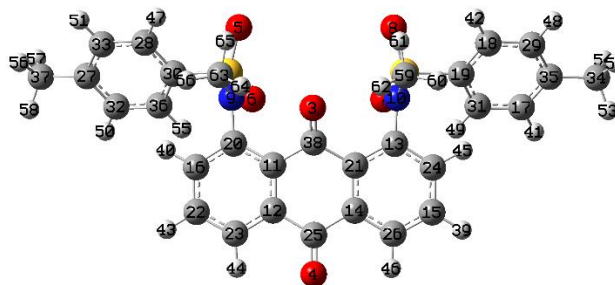

| Atom No. | Element | Cartesian Coordinates |           |           |
|----------|---------|-----------------------|-----------|-----------|
|          |         | X                     | Y         | Z         |
| 1        | S       | -2.751827             | -1.418072 | 0.079166  |
| 2        | S       | 2.751590              | -1.418108 | 0.079991  |
| 3        | O       | 0.000117              | 0.567903  | 1.972344  |
| 4        | O       | 0.000441              | 5.051277  | -0.773200 |
| 5        | O       | 2.417336              | -2.615363 | 0.851430  |
| 6        | O       | 2.046088              | -1.028263 | -1.139489 |
| 7        | O       | -2.046805             | -1.028250 | -1.140595 |
| 8        | O       | -2.417433             | -2.615438 | 0.850370  |
| 9        | N       | 2.582075              | -0.117639 | 1.144218  |
| 10       | N       | -2.581563             | -0.117730 | 1.143472  |
| 11       | C       | 1.282624              | 1.885517  | 0.470806  |
| 12       | C       | 1.277754              | 3.168557  | -0.111779 |
| 13       | C       | -2.515012             | 1.207343  | 0.608491  |
| 14       | C       | -1.277021             | 3.168560  | -0.112053 |
| 15       | C       | -3.679577             | 3.128258  | -0.335494 |
| 16       | C       | 3.696492              | 1.843725  | 0.211731  |
| 17       | C       | -6.329154             | -1.056589 | -1.823464 |
| 18       | C       | -5.363856             | -2.239268 | 0.512278  |
| 19       | C       | -4.496969             | -1.553763 | -0.342301 |
| 20       | C       | 2.515572              | 1.207383  | 0.609147  |
| 21       | C       | -1.282029             | 1.885492  | 0.470480  |
| 22       | C       | 3.680365              | 3.128228  | -0.334698 |
| 23       | C       | 2.470081              | 3.787570  | -0.503517 |
| 24       | C       | -3.695837             | 1.843734  | 0.210882  |
| 25       | C       | 0.000394              | 3.900988  | -0.349050 |
| 26       | C       | -2.469254             | 3.787595  | -0.504039 |
| 27       | C       | 7.221551              | -1.730907 | -0.978958 |
| 28       | C       | 5.363625              | -2.239928 | 0.511873  |
| 29       | C       | -6.717519             | -2.318029 | 0.190749  |
| 30       | C       | 4.496529              | -1.554042 | -0.342213 |
| 31       | C       | -4.972614             | -0.965720 | -1.516782 |
| 32       | C       | 6.328273              | -1.056729 | -1.823871 |
| 33       | C       | 6.717136              | -2.318835 | 0.189829  |

| Atom No. | Element | Cartesian Coordinates |           |           |
|----------|---------|-----------------------|-----------|-----------|
|          |         | X                     | Y         | Z         |
| 34       | C       | -8.683928             | -1.852786 | -1.337620 |
| 35       | C       | -7.222252             | -1.730372 | -0.978013 |
| 36       | C       | 4.971833              | -0.965746 | -1.516684 |
| 37       | C       | 8.683089              | -1.853563 | -1.339040 |
| 38       | C       | 0.000229              | 1.340171  | 1.025625  |
| 39       | H       | -4.610330             | 3.603286  | -0.632256 |
| 40       | H       | 4.636116              | 1.313895  | 0.330040  |
| 41       | H       | -6.699106             | -0.603477 | -2.740298 |
| 42       | H       | -4.976768             | -2.722855 | 1.403012  |
| 43       | H       | 4.611181              | 3.603228  | -0.631305 |
| 44       | H       | 2.414834              | 4.781089  | -0.935209 |
| 45       | H       | -4.635512             | 1.313957  | 0.329002  |
| 46       | H       | -2.413906             | 4.781124  | -0.935694 |
| 47       | H       | 4.976772              | -2.723690 | 1.402615  |
| 48       | H       | -7.392232             | -2.853853 | 0.854146  |
| 49       | H       | -4.280054             | -0.461222 | -2.181922 |
| 50       | H       | 6.697971              | -0.603403 | -2.740697 |
| 51       | H       | 7.392002              | -2.854963 | 0.852829  |
| 52       | H       | -9.308319             | -1.971388 | -0.446173 |
| 53       | H       | -9.037165             | -0.973961 | -1.887257 |
| 54       | H       | -8.858997             | -2.727855 | -1.977426 |
| 55       | H       | 4.279128              | -0.460941 | -2.181441 |
| 56       | H       | 9.308153              | -1.968129 | -0.447518 |
| 57       | H       | 8.858463              | -2.731082 | -1.975399 |
| 58       | H       | 9.035266              | -0.976665 | -1.892391 |
| 59       | C       | -2.888940             | -0.288256 | 2.564714  |
| 60       | H       | -3.925483             | -0.009153 | 2.803529  |
| 61       | H       | -2.713267             | -1.330280 | 2.834053  |
| 62       | H       | -2.195934             | 0.331995  | 3.136586  |
| 63       | C       | 2.889144              | -0.288106 | 2.565522  |
| 64       | H       | 2.195671              | 0.331734  | 3.137292  |
| 65       | H       | 2.713942              | -1.330243 | 2.834727  |
| 66       | H       | 3.925480              | -0.008495 | 2.804618  |

b. Optimized structure of 2

E(RB3LYP) = -2515.94229569 a.u.

Number of imaginary frequency: 0

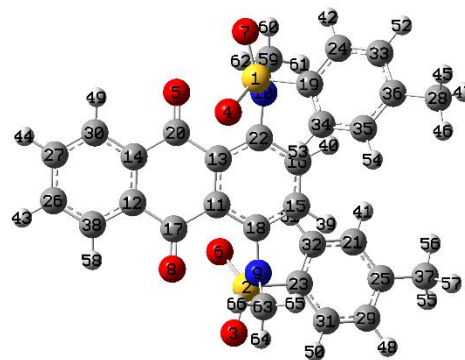

| Atom No. | Element | Cartesian Coordinates |           |           |
|----------|---------|-----------------------|-----------|-----------|
|          |         | X                     | Y         | Z         |
| 1        | S       | 3.902684              | 0.230832  | -0.448976 |
| 2        | S       | -3.902816             | 0.231067  | 0.448748  |
| 3        | O       | -4.950253             | 0.599458  | 1.403088  |
| 4        | O       | 3.530578              | 1.080487  | 0.684792  |
| 5        | O       | 1.968497              | 2.591975  | -1.826979 |
| 6        | O       | -3.530604             | 1.080574  | -0.685090 |
| 7        | O       | 4.950049              | 0.599080  | -1.403453 |
| 8        | O       | -1.968484             | 2.592211  | 1.826841  |
| 9        | N       | -2.498366             | -0.046946 | 1.338678  |
| 10       | N       | 2.498164              | -0.047271 | -1.338750 |
| 11       | C       | -0.599128             | 1.276765  | 0.377930  |
| 12       | C       | -0.546751             | 3.844682  | 0.438376  |
| 13       | C       | 0.599076              | 1.276699  | -0.377988 |
| 14       | C       | 0.547102              | 3.844621  | -0.438325 |
| 15       | C       | -0.619558             | -1.151870 | 0.316463  |
| 16       | C       | 0.619336              | -1.151934 | -0.316324 |
| 17       | C       | -1.130678             | 2.571767  | 0.934947  |
| 18       | C       | -1.234620             | 0.045978  | 0.678939  |
| 19       | C       | 4.351731              | -1.371675 | 0.231569  |
| 20       | C       | 1.130764              | 2.571640  | -0.935005 |
| 21       | C       | -4.190415             | -3.014980 | -1.982491 |
| 22       | C       | 1.234465              | 0.045840  | -0.678931 |
| 23       | C       | -4.351824             | -1.371520 | -0.231621 |
| 24       | C       | 5.183305              | -2.222830 | -0.501786 |
| 25       | C       | -5.013581             | -3.891410 | -1.264591 |
| 26       | C       | -0.545835             | 6.261470  | 0.438569  |
| 27       | C       | 0.546630              | 6.261408  | -0.438310 |
| 28       | C       | 5.377654              | -5.250174 | 1.814673  |
| 29       | C       | -5.506019             | -3.472469 | -0.018380 |
| 30       | C       | 1.090416              | 5.058457  | -0.877552 |
| 31       | C       | -5.183389             | -2.222606 | 0.501824  |
| 32       | C       | -3.856898             | -1.757712 | -1.477495 |
| 33       | C       | 5.505972              | -3.472623 | 0.018560  |

| Atom No. | Element | Cartesian Coordinates |           |           |
|----------|---------|-----------------------|-----------|-----------|
|          |         | X                     | Y         | Z         |
| 34       | C       | 3.856831              | -1.757733 | 1.477495  |
| 35       | C       | 4.190386              | -3.014935 | 1.982636  |
| 36       | C       | 5.013568              | -3.891426 | 1.264831  |
| 37       | C       | -5.377551             | -5.250265 | -1.814243 |
| 38       | C       | -1.089846             | 5.058581  | 0.877702  |
| 39       | H       | -1.121549             | -2.085320 | 0.550986  |
| 40       | H       | 1.121269              | -2.085432 | -0.550784 |
| 41       | H       | -3.812003             | -3.314197 | -2.956815 |
| 42       | H       | 5.586969              | -1.895263 | -1.453983 |
| 43       | H       | -0.970777             | 7.202616  | 0.776305  |
| 44       | H       | 0.971747              | 7.202505  | -0.775963 |
| 45       | H       | 6.464327              | -5.359691 | 1.915007  |
| 46       | H       | 4.932296              | -5.417374 | 2.799999  |
| 47       | H       | 5.034430              | -6.053219 | 1.150684  |
| 48       | H       | -6.159973             | -4.131949 | 0.547648  |
| 49       | H       | 1.935737              | 5.031362  | -1.556574 |
| 50       | H       | -5.587079             | -1.894941 | 1.453976  |
| 51       | H       | -3.239366             | -1.072853 | -2.048509 |
| 52       | H       | 6.159924              | -4.132159 | -0.547405 |
| 53       | H       | 3.239290              | -1.072823 | 2.048437  |
| 54       | H       | 3.811993              | -3.314049 | 2.956999  |
| 55       | H       | -6.464252             | -5.360218 | -1.913761 |
| 56       | H       | -4.932854             | -5.417237 | -2.799906 |
| 57       | H       | -5.033498             | -6.053213 | -1.150560 |
| 58       | H       | -1.935176             | 5.031584  | 1.556717  |
| 59       | C       | 2.538140              | -0.211256 | -2.793683 |
| 60       | H       | 3.577577              | -0.174898 | -3.119856 |
| 61       | H       | 2.095560              | -1.171671 | -3.085043 |
| 62       | H       | 2.001836              | 0.612711  | -3.272197 |
| 63       | C       | -2.538470             | -0.210937 | 2.793589  |
| 64       | H       | -3.577865             | -0.173539 | 3.119781  |
| 65       | H       | -2.096800             | -1.171758 | 3.085021  |
| 66       | H       | -2.001382             | 0.612533  | 3.272079  |

c. Optimized structure of **3**

E(RB3LYP) = -2751.81851735 a.u.

Number of imaginary frequency: 0

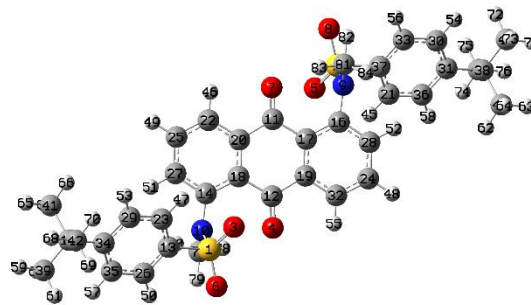

| Atom No. | Element | Cartesian Coordinates |           |           |
|----------|---------|-----------------------|-----------|-----------|
|          |         | X                     | Y         | Z         |
| 1        | S       | -4.284243             | 1.878759  | -0.318031 |
| 2        | S       | 4.284380              | -1.829799 | 0.411457  |
| 3        | O       | -3.512131             | 1.337292  | -1.439372 |
| 4        | O       | -1.081074             | 2.482747  | 0.355759  |
| 5        | O       | 3.587897              | -1.241578 | 1.558105  |
| 6        | O       | -4.573379             | 3.307603  | -0.176219 |
| 7        | O       | 1.075283              | -2.428591 | -0.073988 |
| 8        | O       | 4.527809              | -3.268740 | 0.287668  |
| 9        | N       | 3.467072              | -1.346404 | -0.987040 |
| 10       | N       | -3.527518             | 1.388550  | 1.110323  |
| 11       | C       | 0.624383              | -1.295565 | 0.034594  |
| 12       | C       | -0.652090             | 1.347493  | 0.195133  |
| 13       | C       | -5.861849             | 1.016146  | -0.322870 |
| 14       | C       | -2.746070             | 0.190745  | 1.088692  |
| 15       | C       | -9.661379             | -1.113821 | -0.327439 |
| 16       | C       | 2.688803              | -0.147000 | -0.937681 |
| 17       | C       | 1.361385              | -0.088660 | -0.441886 |
| 18       | C       | -1.404860             | 0.136010  | 0.632455  |
| 19       | C       | 0.709694              | 1.160986  | -0.407515 |
| 20       | C       | -0.750585             | -1.112001 | 0.608933  |
| 21       | C       | 6.071735              | 0.229706  | 0.916697  |
| 22       | C       | -1.391007             | -2.266449 | 1.076146  |
| 23       | C       | -5.981600             | -0.209913 | -0.980657 |
| 24       | C       | 2.626423              | 2.240784  | -1.407962 |
| 25       | C       | -2.691215             | -2.197268 | 1.556960  |
| 26       | C       | -6.958099             | 1.574884  | 0.331517  |
| 27       | C       | -3.365529             | -0.975447 | 1.546208  |
| 28       | C       | 3.296426              | 1.016745  | -1.417003 |
| 29       | C       | -7.204966             | -0.873905 | -0.965438 |
| 30       | C       | 8.158746              | -0.976536 | -0.482934 |
| 31       | C       | 8.378747              | 0.278375  | 0.104656  |
| 32       | C       | 1.340257              | 2.313738  | -0.891297 |
| 33       | C       | 6.926503              | -1.623753 | -0.385005 |
| 34       | C       | -8.328921             | -0.343772 | -0.306722 |
| 35       | C       | -8.176016             | 0.893832  | 0.336231  |
| 36       | C       | 7.308564              | 0.859514  | 0.808460  |
| 37       | C       | 5.883315              | -1.013295 | 0.308450  |
| 38       | C       | 9.727272              | 1.014996  | 0.016187  |
| 39       | C       | -10.770689            | -0.390145 | 0.459140  |
| 40       | C       | 9.515429              | 2.395927  | -0.649550 |
| 41       | C       | -9.457002             | -2.512078 | 0.303797  |
| 42       | C       | -10.134646            | -1.275628 | -1.791895 |

| Atom No. | Element | Cartesian Coordinates |           |           |
|----------|---------|-----------------------|-----------|-----------|
|          |         | X                     | Y         | Z         |
| 43       | C       | 10.766970             | 0.237334  | -0.812635 |
| 44       | C       | 10.295594             | 1.213835  | 1.441791  |
| 45       | H       | 5.263867              | 0.681872  | 1.481844  |
| 46       | H       | -0.845082             | -3.202473 | 1.041743  |
| 47       | H       | -5.130686             | -0.621887 | -1.512186 |
| 48       | H       | 3.114521              | 3.131338  | -1.793508 |
| 49       | H       | -3.187882             | -3.089721 | 1.926842  |
| 50       | H       | -6.866427             | 2.542682  | 0.813512  |
| 51       | H       | -4.392348             | -0.905518 | 1.891163  |
| 52       | H       | 4.310988              | 0.942418  | -1.795511 |
| 53       | H       | -7.282793             | -1.822176 | -1.489366 |
| 54       | H       | 8.955864              | -1.474398 | -1.023002 |
| 55       | H       | 0.797663              | 3.251082  | -0.843135 |
| 56       | H       | 6.783175              | -2.604712 | -0.825973 |
| 57       | H       | -9.016087             | 1.351395  | 0.846007  |
| 58       | H       | 7.440402              | 1.822470  | 1.293312  |
| 59       | H       | -11.693238            | -0.979791 | 0.419632  |
| 60       | H       | -10.506672            | -0.261812 | 1.515113  |
| 61       | H       | -10.993522            | 0.596691  | 0.038043  |
| 62       | H       | 8.818916              | 3.021872  | -0.082074 |
| 63       | H       | 10.468137             | 2.934785  | -0.715810 |
| 64       | H       | 9.116979              | 2.286110  | -1.664712 |
| 65       | H       | -10.398025            | -3.074744 | 0.290223  |
| 66       | H       | -8.710063             | -3.101227 | -0.238289 |
| 67       | H       | -9.126860             | -2.428924 | 1.345676  |
| 68       | H       | -11.080628            | -1.829439 | -1.825617 |
| 69       | H       | -10.295184            | -0.298883 | -2.261959 |
| 70       | H       | -9.406217             | -1.822964 | -2.398960 |
| 71       | H       | 11.703052             | 0.805089  | -0.854324 |
| 72       | H       | 10.994658             | -0.739345 | -0.370936 |
| 73       | H       | 10.431325             | 0.078212  | -1.843780 |
| 74       | H       | 9.619978              | 1.800261  | 2.073047  |
| 75       | H       | 10.462201             | 0.249812  | 1.935495  |
| 76       | H       | 11.254929             | 1.743440  | 1.397586  |
| 77       | C       | -3.410805             | 2.296701  | 2.254930  |
| 78       | H       | -2.381831             | 2.653326  | 2.356012  |
| 79       | H       | -4.056585             | 3.158135  | 2.084780  |
| 80       | H       | -3.724596             | 1.780601  | 3.169587  |
| 81       | C       | 3.278488              | -2.273359 | -2.106564 |
| 82       | H       | 3.934292              | -3.132248 | -1.963898 |
| 83       | H       | 2.246062              | -2.633274 | -2.139193 |
| 84       | H       | 3.534976              | -1.771243 | -3.046336 |

d. Optimized structure of **4**

(Terminal *t*Bu groups were replaced with Me groups)

E(RB3LYP) = -4343.10074070 a.u.

Number of imaginary frequency: 0

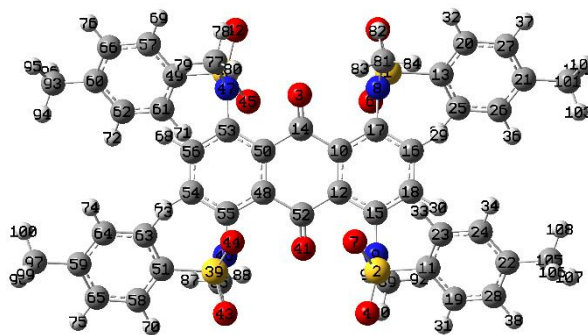

| Atom No. | Element | Cartesian Coordinates |           |           |
|----------|---------|-----------------------|-----------|-----------|
|          |         | X                     | Y         | Z         |
| 1        | S       | 2.737041              | 3.891947  | 0.397802  |
| 2        | S       | 2.737066              | -3.891969 | -0.397673 |
| 3        | O       | -0.000180             | 1.721907  | 1.999042  |
| 4        | O       | 2.393399              | -5.017635 | -1.266409 |
| 5        | O       | 2.393420              | 5.017619  | 1.266547  |
| 6        | O       | 2.045349              | 3.610759  | -0.859259 |
| 7        | O       | 2.045449              | -3.610798 | 0.859433  |
| 8        | N       | 2.556077              | 2.503349  | 1.341059  |
| 9        | N       | 2.556042              | -2.503363 | -1.340905 |
| 10       | C       | 1.292058              | 0.596755  | 0.374257  |
| 11       | C       | 4.487109              | -4.058607 | -0.011357 |
| 12       | C       | 1.292051              | -0.596784 | -0.374047 |
| 13       | C       | 4.487060              | 4.058588  | 0.011377  |
| 14       | C       | -0.000165             | 1.080952  | 0.959487  |
| 15       | C       | 2.517439              | -1.234219 | -0.683695 |
| 16       | C       | 3.714157              | 0.616837  | 0.323815  |
| 17       | C       | 2.517454              | 1.234198  | 0.683863  |
| 18       | C       | 3.714151              | -0.616849 | -0.323693 |
| 19       | C       | 5.343980              | -4.673866 | -0.928538 |
| 20       | C       | 5.343986              | 4.673856  | 0.928500  |
| 21       | C       | 7.233673              | 4.292242  | -0.576129 |
| 22       | C       | 7.233760              | -4.292254 | 0.575974  |
| 23       | C       | 4.983088              | -3.571027 | 1.196366  |
| 24       | C       | 8.738238              | 4.444994  | -0.861825 |
| 25       | C       | 6.345463              | -3.690667 | 1.479220  |
| 26       | C       | 8.738345              | -4.444998 | 0.861571  |
| 27       | C       | 4.982964              | 3.571004  | -1.196375 |
| 28       | C       | 6.345320              | 3.690648  | -1.479316 |
| 29       | C       | 6.698483              | 4.780915  | 0.630184  |
| 30       | C       | 6.698496              | -4.780922 | -0.630307 |
| 31       | C       | 9.109751              | 5.947322  | -0.862216 |
| 32       | C       | 9.140158              | 3.850079  | -2.224792 |
| 33       | C       | 9.109864              | -5.947324 | 0.861957  |
| 34       | C       | 9.546012              | 3.717087  | 0.239371  |
| 35       | C       | 9.546042              | -3.717101 | -0.239688 |
| 36       | C       | 9.140354              | -3.850064 | 2.224504  |
| 37       | H       | 4.652346              | 1.108408  | 0.559985  |
| 38       | H       | 4.652334              | -1.108411 | -0.559900 |

| Atom No. | Element | Cartesian Coordinates |           |           |
|----------|---------|-----------------------|-----------|-----------|
|          |         | X                     | Y         | Z         |
| 73       | N       | -2.556371             | 2.503479  | 1.340852  |
| 74       | C       | -1.292391             | -0.596800 | -0.373994 |
| 75       | C       | -4.486944             | 4.058837  | 0.010757  |
| 76       | C       | -1.292388             | 0.596781  | 0.374229  |
| 77       | C       | -4.487039             | -4.058830 | -0.010733 |
| 78       | C       | -0.000179             | -1.080972 | -0.959266 |
| 79       | C       | -2.517779             | 1.234262  | 0.683786  |
| 80       | C       | -3.714486             | -0.616863 | -0.323616 |
| 81       | C       | -2.517782             | -1.234260 | -0.683581 |
| 82       | C       | -3.714484             | 0.616889  | 0.323781  |
| 83       | C       | -5.343901             | 4.674312  | 0.927718  |
| 84       | C       | -5.343943             | -4.674272 | -0.927765 |
| 85       | C       | -7.233610             | -4.292688 | 0.576900  |
| 86       | C       | -7.233474             | 4.292709  | -0.577060 |
| 87       | C       | -4.982778             | 3.571159  | -1.196981 |
| 88       | C       | -8.738162             | -4.445503 | 0.862635  |
| 89       | C       | -6.345094             | 3.690912  | -1.480078 |
| 90       | C       | -8.738005             | 4.445536  | -0.862899 |
| 91       | C       | -4.982946             | -3.571178 | 1.196986  |
| 92       | C       | -6.345282             | -3.690924 | 1.479991  |
| 93       | C       | -6.698418             | -4.781427 | -0.629390 |
| 94       | C       | -6.698356             | 4.781474  | 0.629252  |
| 95       | C       | -9.109635             | -5.947833 | 0.863121  |
| 96       | C       | -9.140087             | -3.850523 | 2.225573  |
| 97       | C       | -9.109464             | 5.947870  | -0.863417 |
| 98       | C       | -9.545977             | -3.717680 | -0.238594 |
| 99       | C       | -9.545903             | 3.717727  | 0.238279  |
| 100      | C       | -9.139843             | 3.850553  | -2.225861 |
| 101      | H       | -4.652677             | -1.108440 | -0.559767 |
| 102      | H       | -4.652672             | 1.108487  | 0.559898  |
| 103      | H       | -4.946149             | 5.087942  | 1.848532  |
| 104      | H       | -4.946136             | -5.087881 | -1.848564 |
| 105      | H       | -4.303308             | 3.123046  | -1.914074 |
| 106      | H       | -6.704968             | 3.312726  | -2.430120 |
| 107      | H       | -4.303518             | -3.123091 | 1.914135  |
| 108      | H       | -6.705215             | -3.312758 | 2.430020  |
| 109      | H       | -7.348079             | -5.268875 | -1.350345 |
| 110      | H       | -7.348058             | 5.268950  | 1.350151  |

|    |   |           |           |           |     |   |            |           |           |
|----|---|-----------|-----------|-----------|-----|---|------------|-----------|-----------|
| 39 | H | 4.946118  | -5.087439 | -1.849331 | 111 | H | -8.892604  | -6.423370 | -0.098966 |
| 40 | H | 4.946180  | 5.087433  | 1.849315  | 112 | H | -10.180635 | -6.072821 | 1.063012  |
| 41 | H | 4.303682  | -3.123093 | 1.913630  | 113 | H | -8.553650  | -6.489434 | 1.636521  |
| 42 | H | 6.705457  | -3.312566 | 2.429251  | 114 | H | -8.926170  | -2.777060 | 2.282859  |
| 43 | H | 4.303514  | 3.123064  | -1.913594 | 115 | H | -8.626836  | -4.347711 | 3.056327  |
| 44 | H | 6.705256  | 3.312544  | -2.429368 | 116 | H | -10.217061 | -3.980426 | 2.379521  |
| 45 | H | 7.348158  | 5.268243  | 1.351207  | 117 | H | -8.892486  | 6.423409  | 0.098681  |
| 46 | H | 7.348128  | -5.268242 | -1.351375 | 118 | H | -10.180451 | 6.072867  | -1.063375 |
| 47 | H | 8.892692  | 6.422798  | 0.099895  | 119 | H | -8.553426  | 6.489460  | -1.636786 |
| 48 | H | 10.180761 | 6.072293  | -1.062061 | 120 | H | -9.341869  | -4.125802 | -1.233979 |
| 49 | H | 8.553804  | 6.488975  | -1.635604 | 121 | H | -9.307182  | -2.648092 | -0.259196 |
| 50 | H | 8.926196  | 2.776628  | -2.282148 | 122 | H | -10.621338 | -3.821510 | -0.050734 |
| 51 | H | 8.626949  | 4.347339  | -3.055528 | 123 | H | -9.341857  | 4.125849  | 1.233677  |
| 52 | H | 10.217141 | 3.979946  | -2.378709 | 124 | H | -9.307123  | 2.648136  | 0.258900  |
| 53 | H | 8.892749  | -6.422812 | -0.100134 | 125 | H | -10.621250 | 3.821569  | 0.050347  |
| 54 | H | 10.180887 | -6.072288 | 1.061738  | 126 | H | -8.925924  | 2.777089  | -2.283130 |
| 55 | H | 8.553967  | -6.488970 | 1.635386  | 127 | H | -8.626538  | 4.347738  | -3.056584 |
| 56 | H | 9.341911  | 4.125145  | 1.234786  | 128 | H | -10.216807 | 3.980457  | -2.379879 |
| 57 | H | 9.307189  | 2.647502  | 0.259902  | 129 | C | -2.850295  | 2.546700  | 2.774477  |
| 58 | H | 10.621378 | 3.820895  | 0.051534  | 130 | H | -2.651557  | 3.555719  | 3.137065  |
| 59 | H | 9.341880  | -4.125176 | -1.235083 | 131 | H | -3.890317  | 2.267265  | 2.997189  |
| 60 | H | 9.307208  | -2.647519 | -0.260221 | 132 | H | -2.166022  | 1.861260  | 3.278318  |
| 61 | H | 10.621421 | -3.820896 | -0.051917 | 133 | C | 2.849968   | 2.546343  | 2.774702  |
| 62 | H | 8.926391  | -2.776613 | 2.281862  | 134 | H | 2.651470   | 3.555373  | 3.137394  |
| 63 | H | 8.627201  | -4.347316 | 3.055281  | 135 | H | 2.165509   | 1.861014  | 3.278445  |
| 64 | H | 10.217348 | -3.979924 | 2.378352  | 136 | H | 3.889913   | 2.266624  | 2.997405  |
| 65 | S | -2.737070 | -3.892010 | -0.397289 | 137 | C | -2.850200  | -2.546651 | -2.774316 |
| 66 | S | -2.737001 | 3.892008  | 0.397430  | 138 | H | -2.651458  | -3.555667 | -3.136911 |
| 67 | O | -0.000211 | -1.721946 | -1.998810 | 139 | H | -3.890201  | -2.267191 | -2.997092 |
| 68 | O | -2.393349 | 5.017720  | 1.266111  | 140 | H | -2.165879  | -1.861215 | -3.278099 |
| 69 | O | -2.393374 | -5.017707 | -1.265972 | 141 | C | 2.849849   | -2.546340 | -2.774566 |
| 70 | O | -2.045325 | -3.610639 | 0.859702  | 142 | H | 2.651339   | -3.555368 | -3.137257 |
| 71 | O | -2.045179 | 3.610603  | -0.859510 | 143 | H | 2.165352   | -1.861012 | -3.278260 |
| 72 | N | -2.556366 | -2.503463 | -1.340672 | 144 | H | 3.889777   | -2.266607 | -2.997329 |

## 9. Reference

- S1. T. Takeda, Y. Suzuki, J. Kawamata, S. Noro, T. Nakamura, T. Akutagawa *Phys. Chem. Chem. Phys.* 2017, **19**, 23905-23909.
- S2. T. Takeda, S. Noro, T. Nakamura, Y. Suzuki, J. Kawamata, T. Akutagawa *CrystEngComm* 2018, **20**, 17-24.
